# Supplementary material for: Socioeconomic inequality in salt intake in Britain 10 years after a national salt reduction programme
Source: HighWire-hosted journal article supplement (doi:10.1136/bmjopen-2014-005683), 2014-08-01
Supplement: bmjopen-2014-005683supp_tables.pdf [file bmjopen-2014-005683supp_tables.pdf]

**Table Appendix 1:** Model comparison.

|          | <b>Model<br/>1</b> | <b>Model<br/>2</b> | <b>Model<br/>3</b> | <b>Model<br/>4</b> |
|----------|--------------------|--------------------|--------------------|--------------------|
| Deviance | 1016.58            | 938.9              | 586.5              | 574.8              |
| pD       | 8.1                | 12.4               | 20.5               | 32.7               |
| DIC      | 1032.8             | 963.8              | 627.6              | 640.1              |

Note: Model 1= Region only; Model 2 = Model 1 + Age + Sex + Body Mass Index + Energy intake; Model 3 = Model 2 + Smoking habit + Education + Socio-economic status + Marital status + Alcohol consumption; Model 4 = Model 3 with nonlinear assumption on all continuous variables (Age, BMI, Energy intake, Alcohol consumption).

**Table Appendix 2.** Estimated coefficients of each level of education attainment in 2000-01 and 2008-11 using the assumption of 2,500 mg/day intake of dietary sodium.

|                          | <b>Mean %<br/>change</b> | <b>90% Credible<br/>interval</b> |       |
|--------------------------|--------------------------|----------------------------------|-------|
| <b>2000-01</b>           |                          |                                  |       |
| Higher education         | Reference                |                                  |       |
| A level or<br>equivalent | 0.5%                     | -2.3%                            | 3.3%  |
| GCSE or<br>equivalent    | 1.4%                     | -1.3%                            | 4.5%  |
| No qualification         | 3.5%                     | 0.1%                             | 7.2%  |
| <b>2008-11</b>           |                          |                                  |       |
| Higher education         | Reference                |                                  |       |
| A level or<br>equivalent | 2.0%                     | 0.2%                             | 8.6%  |
| GCSE or<br>equivalent    | 3.6%                     | -1.3%                            | 8.3%  |
| No qualification         | 5.7%                     | 0.1%                             | 11.1% |
